# Supplementary material
Source: PubMed Central journal article supplement (PMC6642632)
Supplement: NIHMS1522377-supplement-1.pdf [file NIHMS1522377-supplement-1.pdf]

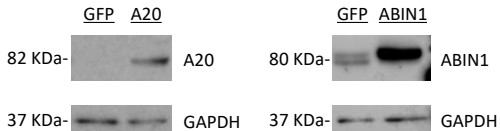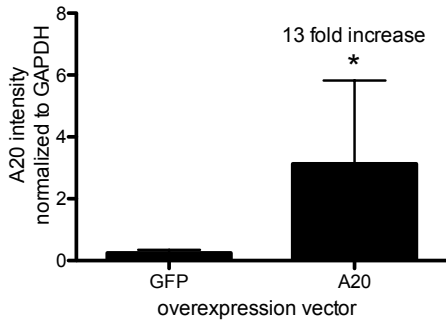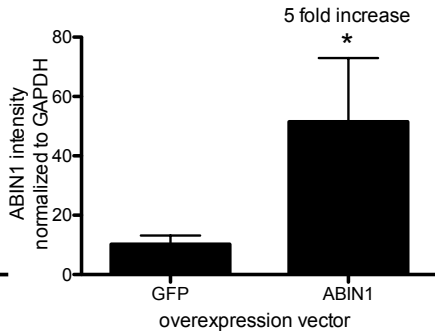

**Figure S1: Lentiviral protein overexpression analysis.**

The top panel includes a representative western blot comparing A20 and ABIN1 overexpressing with mock infected (GFP expressing) keratinocytes. Bottom panel shows quantitated results for the six replicates. GAPDH was used as the loading control (\* represents significance ( $p$ -value < 0.05, student's t-test)).

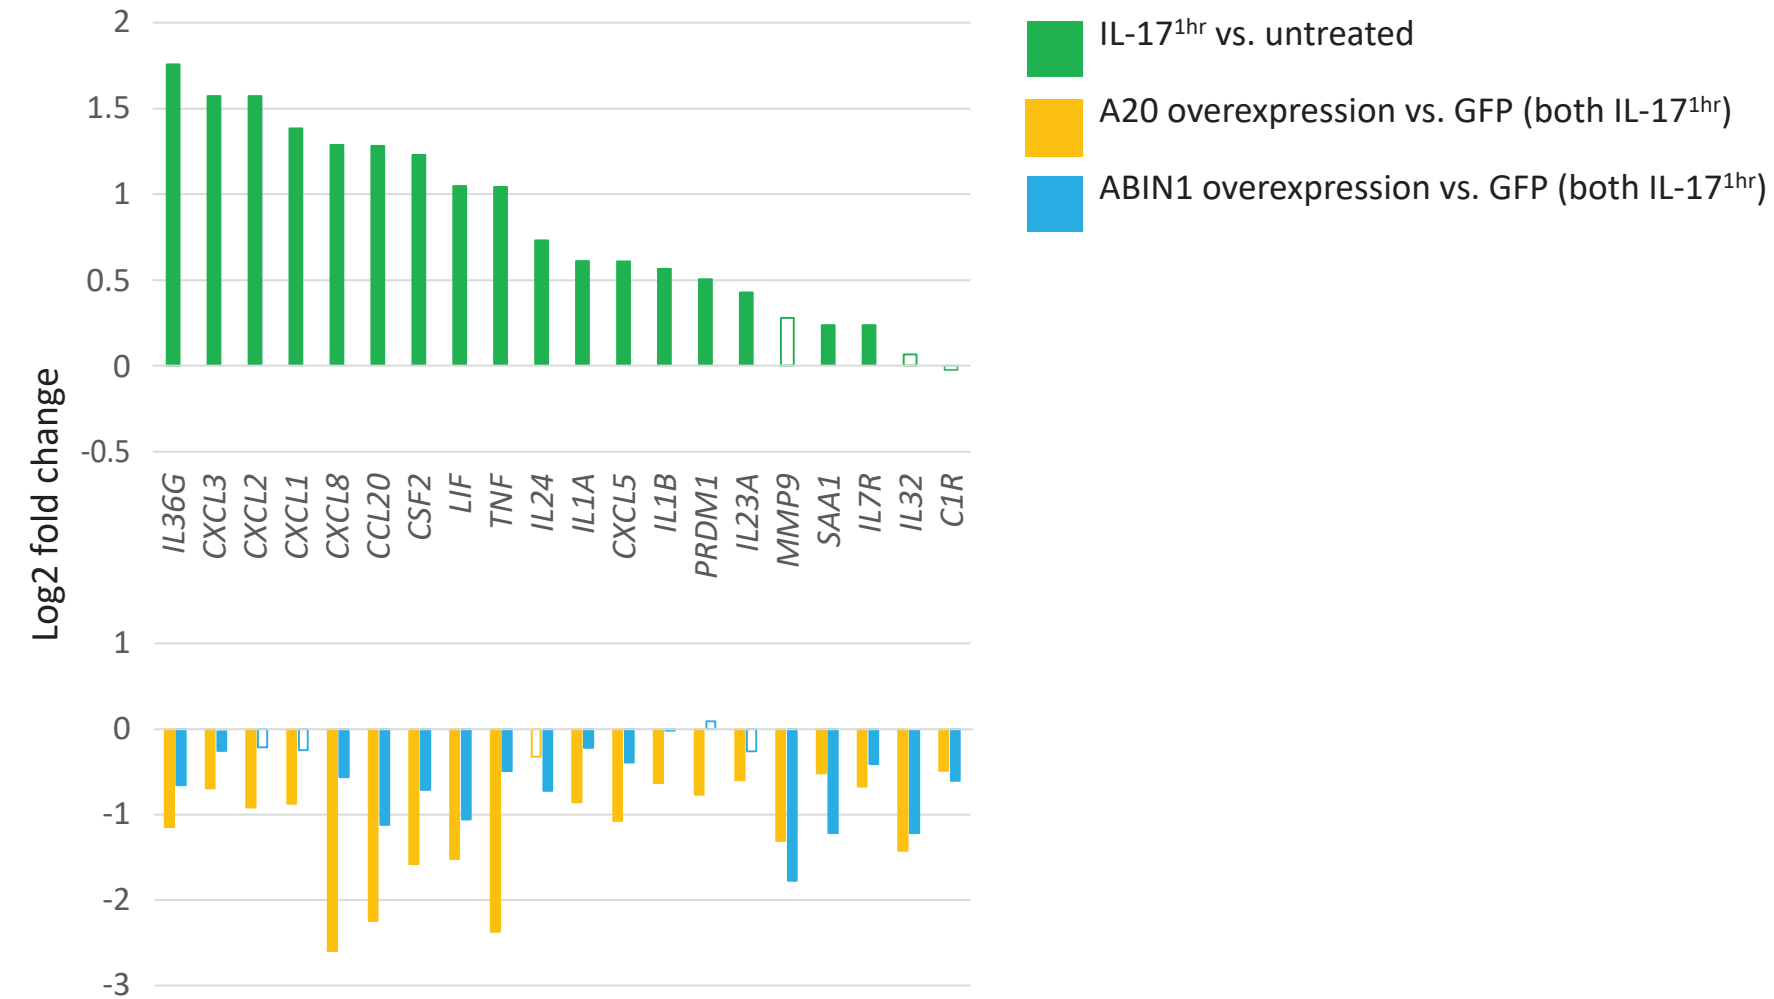

**Figure S2: A20 robustly and ABIN1 modestly represses IL-17A induced inflammatory transcriptional programs.**

Top panel depicts relative expression (log<sub>2</sub> fold change) of mock infected (GFP) keratinocytes incubated with IL-17A for 1 hour versus untreated mock infected keratinocytes. Bottom panel depicts relative expression (log<sub>2</sub> fold change) for either A20 or ABIN1 overexpressing keratinocytes compared to mock infected (GFP) keratinocytes, all samples treated with IL-17A for 1 hour. Data shown represents edgeR RNA-seq differential expression results for 6 replicates for each permutation (FDR < 0.05 except for non-shaded bars).

Log2 fold change

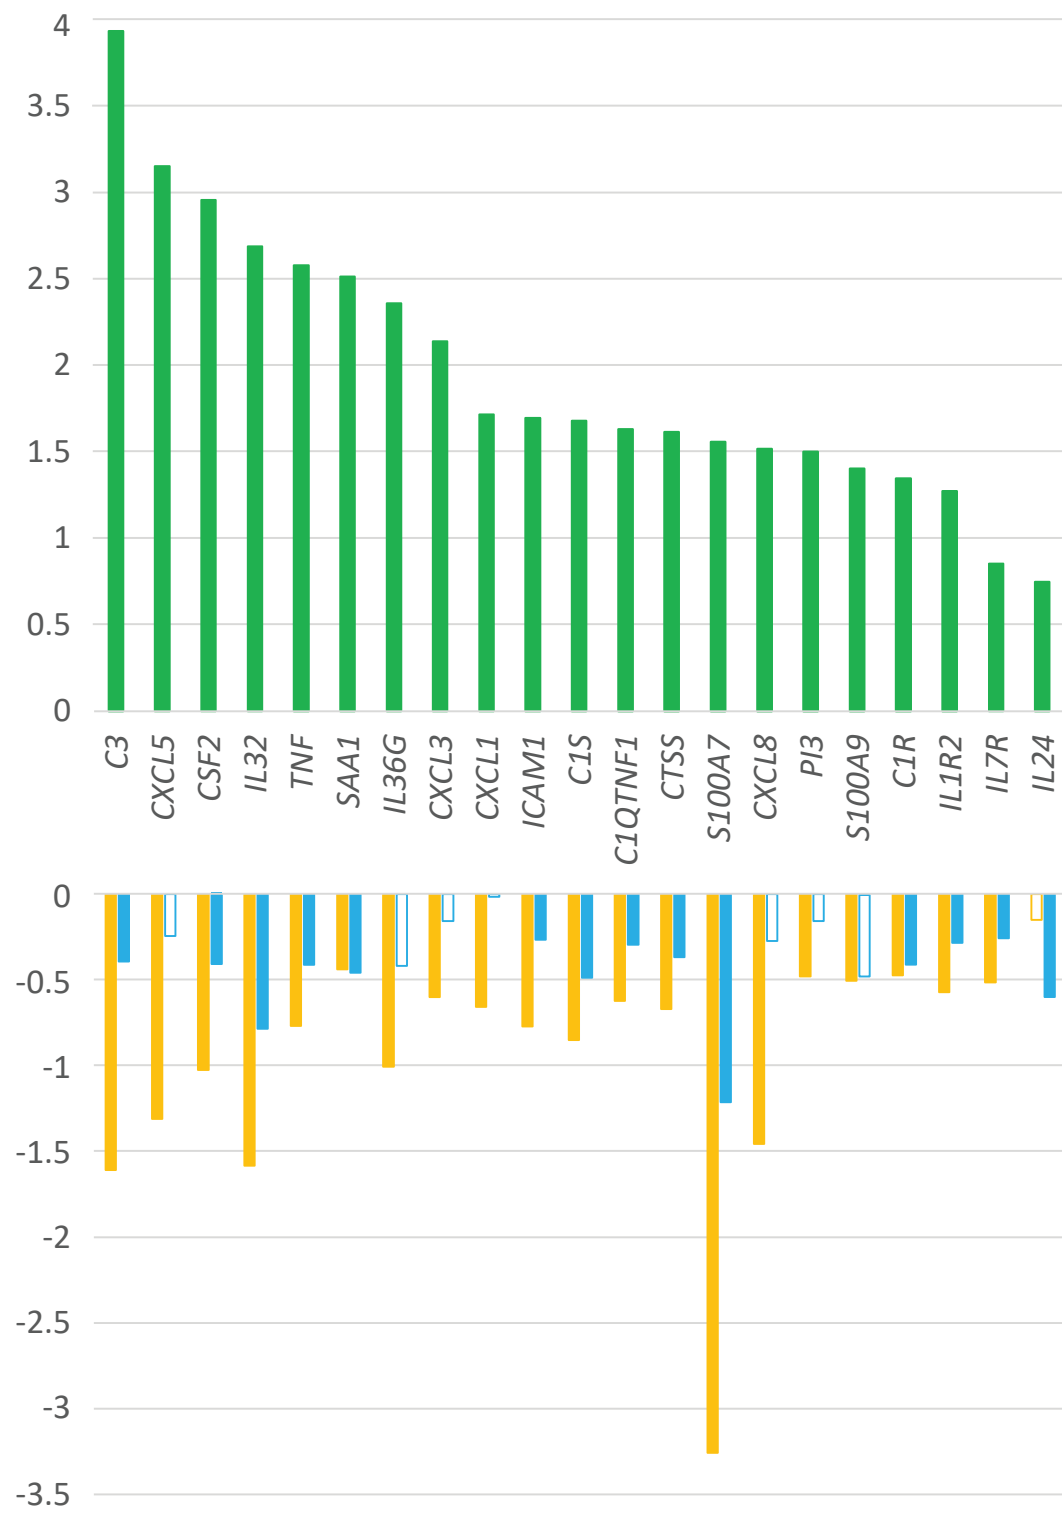

- TNF<sup>24hr</sup> vs. untreated
- A20 overexpression vs. GFP (both TNF<sup>24hr</sup>)
- ABIN1 overexpression vs. GFP (both TNF<sup>24hr</sup>)

**Figure S3: A20 robustly and ABIN1 weakly represses TNF $\alpha$  induced inflammatory transcriptional programs.**

Top panel depicts relative expression (log<sub>2</sub> fold change) of mock infected (GFP) keratinocytes incubated with TNF $\alpha$  for 24 hours versus untreated mock infected keratinocytes. Bottom panel depicts relative expression (log<sub>2</sub> fold change) for either A20 or ABIN1 overexpressing keratinocytes compared to mock infected (GFP) keratinocytes, all samples treated with TNF $\alpha$  for 24 hours. Data shown represents edgeR RNA-seq differential expression results for 6 replicates for each permutation (FDR < 0.05 except for non-shaded bars).

**Supplemental Table 3:** Lentiviral overexpression open reading frame vectors.

| <b>Name</b> | <b>GeneCopoeia Catalog Number</b> | <b>Full Name</b>                               |
|-------------|-----------------------------------|------------------------------------------------|
| A20/TNFAIP3 | EX-K6040-Lv105-50                 | ORF expression clone for A20(NM 001270507.1)   |
| EGFP        | EX-EGFP-Lv105-50                  | Control vector (with EGFP) for pReceiver-Lv105 |
| ABIN1/TNIP1 | EX-T8175-Lv105-50                 | ORF expression clone for ABIN1(NM 001252391.1) |
